# Supplementary material for: An asparagine metabolism-based classification reveals the metabolic and immune heterogeneity of hepatocellular carcinoma
Source: PubMed Central journal article supplement (PMC9594908; doi:10.1186/s12920-022-01380-z), 2022-10-25
Supplement: 12920_2022_1380_MOESM1_ESM.pdf [file 12920_2022_1380_MOESM1_ESM.pdf]

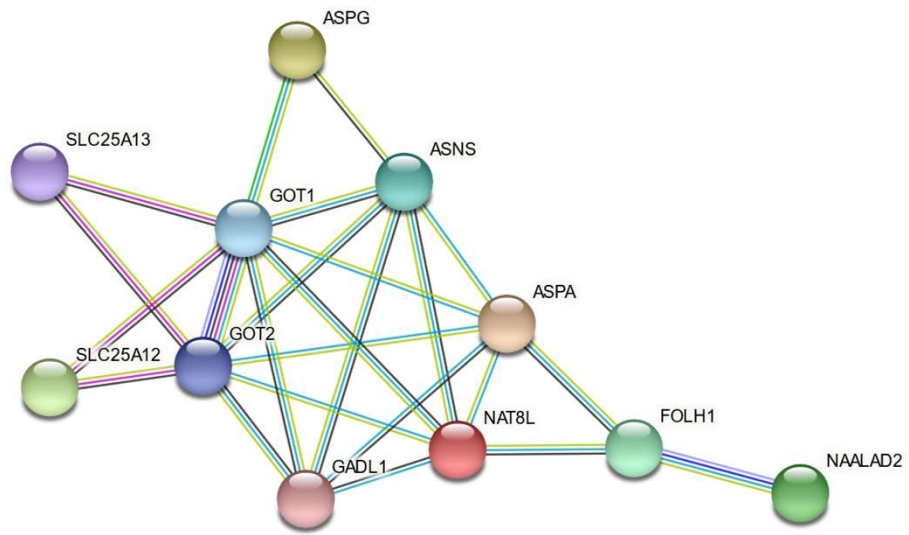

Supplementary Figure 1. The interaction between asparagine metabolism gene set.
