# Supplementary material for: An asparagine metabolism-based classification reveals the metabolic and immune heterogeneity of hepatocellular carcinoma
Source: PubMed Central journal article supplement (PMC9594908; doi:10.1186/s12920-022-01380-z), 2022-10-25
Supplement: 12920_2022_1380_MOESM3_ESM.pdf [file 12920_2022_1380_MOESM3_ESM.pdf]

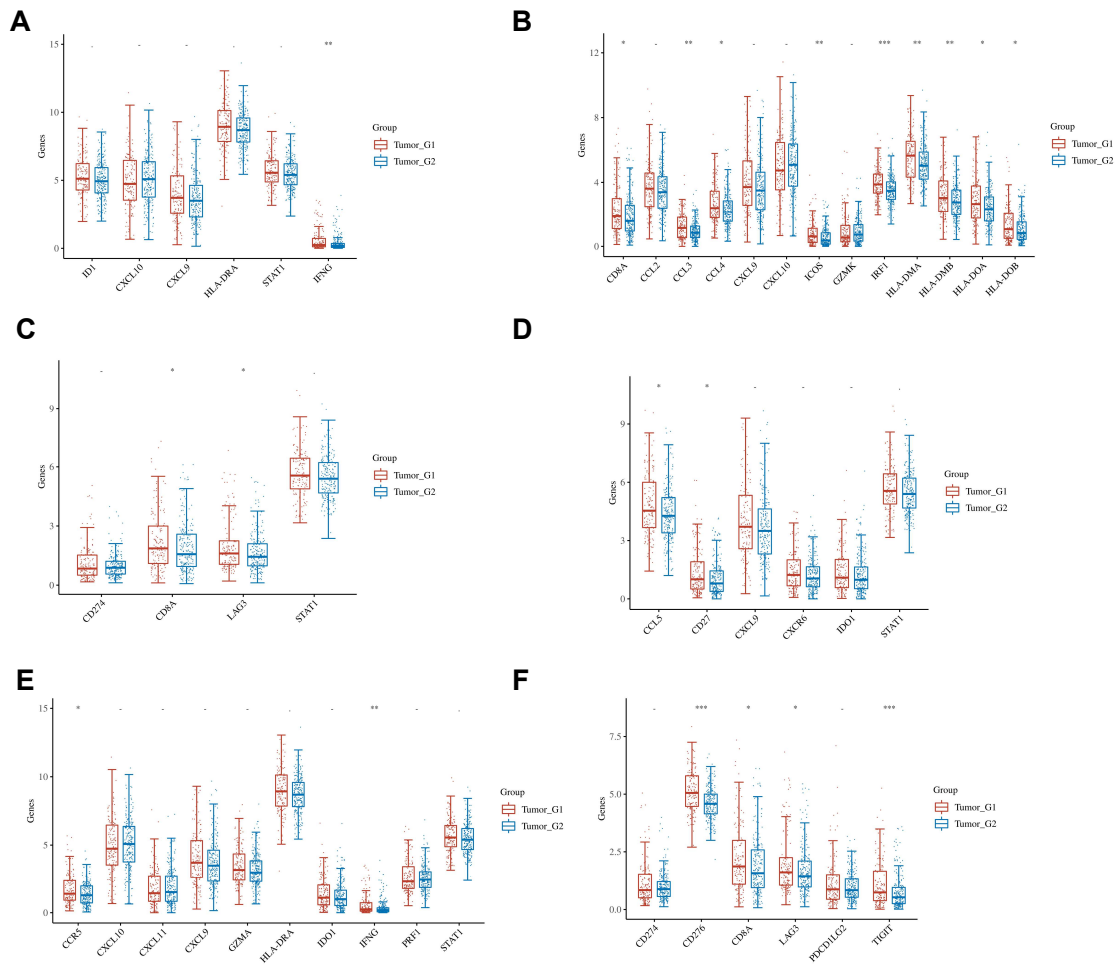

Supplementary Figure 3. The expression of ICI response prediction gene sets in high- and low- asparagine metabolism subgroups. A. 6-Genes Interferon Gamma. B. Gajewski 13-Genes Inflammatory. C. Inflammatory D. Interferon Gamma Biology. E. Ribas 10-Genes Interferon Gamma. F. T-cell Exhaustion. Tumor\_G1 = high asparagine metabolism HCC group; Tumor\_G2 = low asparagine metabolism HCC group.
