# Supplementary material for: An asparagine metabolism-based classification reveals the metabolic and immune heterogeneity of hepatocellular carcinoma
Source: BMC Med Genomics. 2022 Oct 25;15:222. doi: 10.1186/s12920-022-01380-z (PMC9594908; doi:10.1186/s12920-022-01380-z)
Supplement: Supplementary file 6 — Additional file 6. Table S3: Six established gene sets for predicting the patients' response to ICI therapy. [file 12920_2022_1380_MOESM6_ESM.xlsx]

## Sheet: Sheet1
6-Gene Interferon Gamma https://doi.org/10.1172/JCI91190	Gajewski 13-Gene Inflammatory https://doi.org/10.1038/nature14404	Inflammatory signature	Interferon gamma biology signature	Ribas 10-Gene Interferon Gamma	T-cell Exhaustion
ID1	CD8A	CD274	CCL5	CCR5	CD274
CXCL10	CCL2	CD8A	CD27	CXCL10	CD276
CXCL9	CCL3	LAG3	CXCL9	CXCL11	CD8A
HLA-DRA	CCL4	STAT1	CXCR6	CXCL9	LAG3
STAT1	CXCL9		IDO1	GZMA	PDCD1LG2
IFNG	CXCL10		STAT1	HLA-DRA	TIGIT
	ICOS			IDO1
	GZMK			IFNG
	IRF1			PRF1
	HLA-DMA			STAT1
	HLA-DMB
	HLA-DOA
	HLA-DOB
